# Supplementary material
Source: publisher figshare collection journal article supplement (https://karger.figshare.com/ndownloader/files/26062604)
Supplement: Supplementary file 1 [file 26062604]

**Supplementary appendix**

Table S2. Summarization of data on male proportion, age, ICS use and GOLD stage between groups

| **Patients characteristics** | **PCOPD** | **ECOPD** | ***P*** |
| --- | --- | --- | --- |
| Male | 16777/28382  (59.1%) | 35377/62507  (56.6%) | < 0.0001 |
| Age | 74.0 ± 2.5 | 71.9 ± 2.0 | < 0.05 |
| ICS use | 4888/25861  (18.9%) | 13197/53096  (24.8%) | < 0.0001 |
| GOLD Stage(III-IV) | 1469/4071  (36.1%) | 5217/13115  (39.8%) | < 0.0001 |

PCOPD, chronic obstructive pulmonary disease with community-acquired pneumonia; ECOPD, acute exacerbation of chronic obstructive pulmonary disease; ICS, inhaled corticosteroids; GOLD, Global Initiative for Chronic Obstructive Lung Disease.
